# Supplementary material for: An integrated approach identifies new oncotargets in melanoma
Source: PubMed Central journal article supplement (PMC5837771; doi:10.18632/oncotarget.23727), 2017-12-15
Supplement: oncotarget-09-11489-s001.pdf [file oncotarget-09-11489-s001.pdf]

# An integrated approach identifies new oncotargets in melanoma

## SUPPLEMENTARY MATERIALS

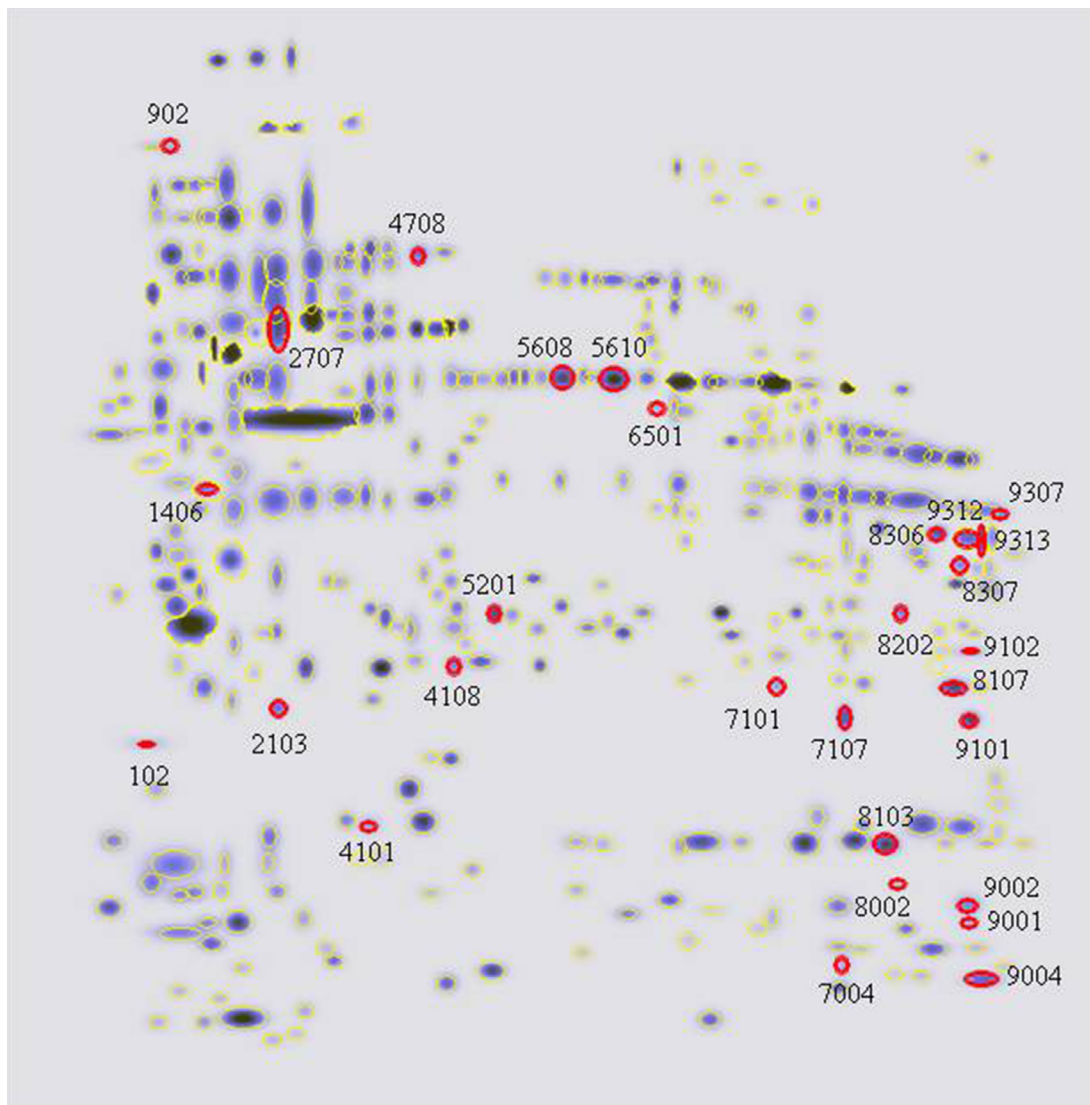

Supplementary Figure 1: Identified protein species marked with the numbers corresponding to the standard spot number.

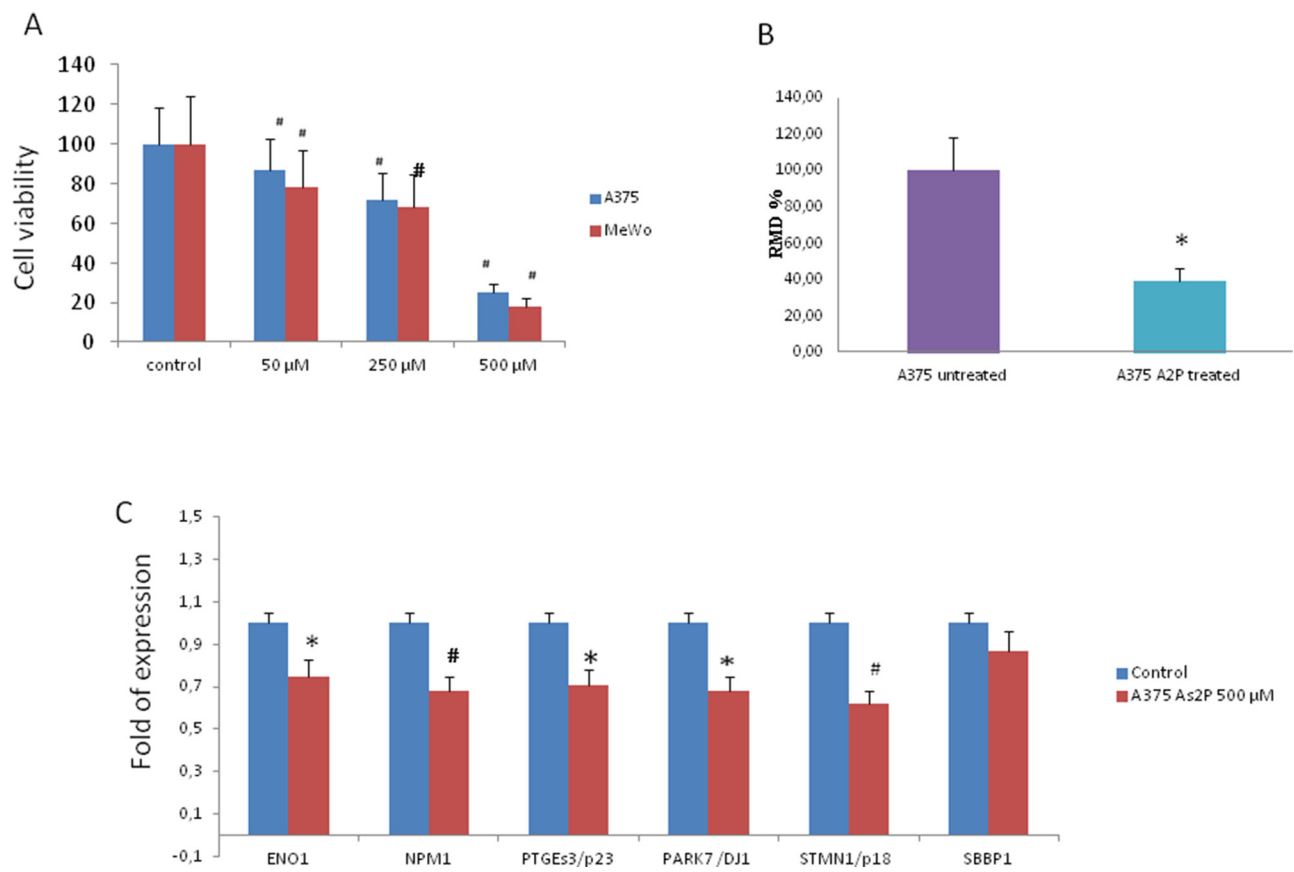

**Supplementary Figure 2:** Cell viability in Mewo and A375A (A), migration ability of A375 cells (B) and gene expression modulation in A375 in A2P treated cells. (\* $p < 0.05$ ; # $p < 0.01$ ).

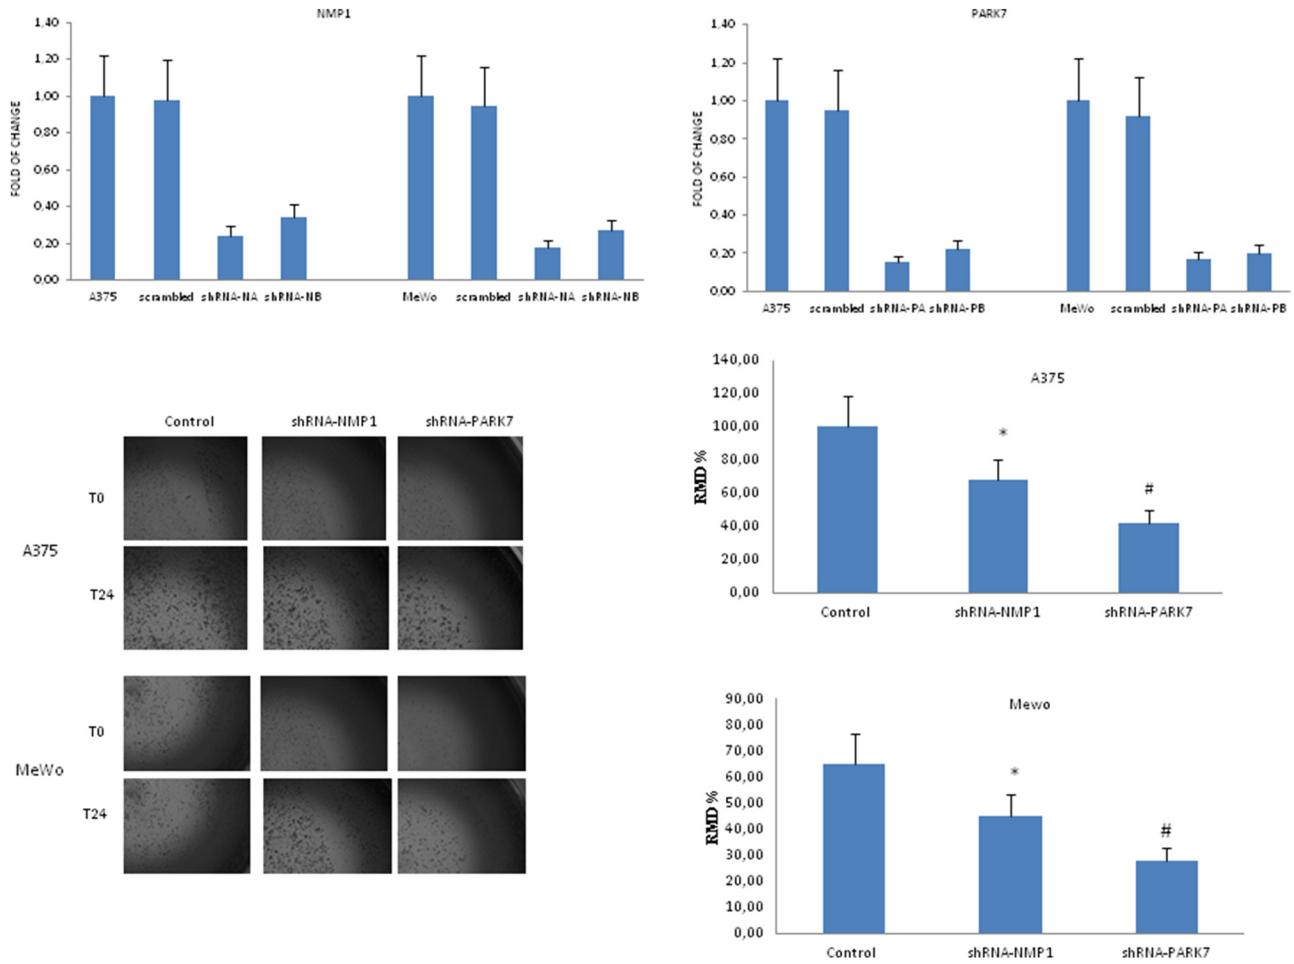

**Supplemental Figure 3: A375 and MeWo melanoma cells were transduced by lentiviral particles encoding sequences for different shRNAs specific for NMP1 (shRNA-NA and shRNA-NB) and PARK7 (shRNA-PA and shRNA-PB) and negative control (scrambled).** Transduction efficiency was monitored after 24 h by Real Time gene expression analysis (A). Migration ability in knockdown NMP1 and PARK7 cells was evaluated by Scratch test (B) and Relative Migration Distance values (C)  $^*(p < 0.05)$ ,  $^{\#}(p < 0.01)$ .

**Supplementary Table 1: Proteins identified and apoptosis.** See Supplementary\_Table\_1

**Supplementary Table 2: Protein-protein functional association in apoptosis.** See Supplementary\_Table\_2

**Supplementary Table 3: Proteins identified and metastasis.** See Supplementary\_Table\_3

**Supplementary Table 4: Protein-protein functional association in metastasis.** See Supplementary\_Table\_4

**Supplementary Table 5: Mutual exclusion and co-occurrence analysis**

| Gene Pairs    |               | co-occurrence    |                |                                   |                         |
|---------------|---------------|------------------|----------------|-----------------------------------|-------------------------|
| Gene A        | Gene B        | <i>p</i> -Value  | Log Odds Ratio | Association                       | Statistical significant |
| <i>ENO1</i>   | <i>PTGES3</i> | 0.0000229        | 1.953          | Tendency towards co-occurrence    | <b>Significant</b>      |
| <i>PARK7</i>  | <i>STMN1</i>  | 0.0000101        | 1.607          | Tendency towards co-occurrence    | <b>Significant</b>      |
| <i>ENO1</i>   | <i>PARK7</i>  | 0.0000568        | 1.587          | Tendency towards co-occurrence    | <b>Significant</b>      |
| <i>NPM1</i>   | <i>PARK7</i>  | 0.0183           | 1.1678         | Tendency towards co-occurrence    | <b>Significant</b>      |
| <i>PARK7</i>  | <i>SSBP1</i>  | 0.000454         | 1.009          | Tendency towards co-occurrence    | <b>Significant</b>      |
| <i>PTGES3</i> | <i>SSBP1</i>  | 0.00555          | 0.874          | Tendency towards co-occurrence    | <b>Significant</b>      |
| <i>ENO1</i>   | <i>NPM1</i>   | 0.0526           | 1.065          | Tendency towards co-occurrence    |                         |
| <i>ENO1</i>   | <i>STMN1</i>  | 0.0561           | 0.800          | Tendency towards co-occurrence    |                         |
| <i>PTGES3</i> | <i>NPM1</i>   | 0.0683           | 0.978          | Tendency towards co-occurrence    |                         |
| <i>NPM1</i>   | <i>STMN1</i>  | 0.114            | 0.796          | Tendency towards co-occurrence    |                         |
| <i>PTGES3</i> | <i>PARK7</i>  | 0.125            | 0.583          | Tendency towards co-occurrence    |                         |
| <i>NPM1</i>   | <i>SSBP1</i>  | 0.166            | 0.497          | Tendency towards co-occurrence    |                         |
| <i>STMN1</i>  | <i>SSBP1</i>  | 0.308            | 0.203          | Tendency towards co-occurrence    |                         |
| Gene Pairs    |               | mutual exclusion |                |                                   |                         |
| Gene A        | Gene B        | <i>p</i> -Value  | Log Odds Ratio | Association                       | Statistical significant |
| <i>ENO1</i>   | <i>SSBP1</i>  | 0.427            | -0.141         | Tendency towards mutual exclusion |                         |
| <i>PTGES3</i> | <i>STMN1</i>  | 0.126            | -0.980         | Tendency towards mutual exclusion |                         |
